# Supplementary material
Source: publisher figshare collection journal article supplement (https://tandf.figshare.com/ndownloader/files/17563415)
Supplement: Supplementary file 1 [file 17563415]

**Table S4.** Possible overlap of participants in the multiple publications and reasons for their exclusion.

| <b>Author,<br/>year</b> | <b>Multiple publication<br/>references</b>                                                                                                                     | <b>Reasons to be considered the main study</b>                                                                                                                                                              |
|-------------------------|----------------------------------------------------------------------------------------------------------------------------------------------------------------|-------------------------------------------------------------------------------------------------------------------------------------------------------------------------------------------------------------|
| Brouwer et al. 2017     | - van der Mark et al. 2014                                                                                                                                     | Brouwer et al. 2017 is the most recent study, with a larger number of participants and more participants exposed to paraquat.                                                                               |
| Sanders et al. 2017     | - Ritz et al. 2009<br>- Costello et al. 2009<br>- Gatto et al. 2009<br>- Gatto et al. 2010<br>- Wang et al. 2011<br>- Lee et al. 2012<br>- Narayan et al. 2017 | Sanders et al. 2017 is not the study with the largest sample of participants, but it has the highest number of participants exposed to paraquat.                                                            |
| Tanner et al. 2011      | - Goldman et al. 2012<br>- Kamel et al. 2014<br>- Furlong et al. 2015                                                                                          | Tanner et al. 2011 is the study with the largest sample of participants.                                                                                                                                    |
| Firestone et al. 2010   | - Firestone et al. 2005                                                                                                                                        | Firestone et al. 2010 is the most recent study, with a larger sample of participants                                                                                                                        |
| Elbaz et al. 2009       | - Pouchieu et al. 2018                                                                                                                                         | Although Pouchieu et al. 2018 is the most recent study with a larger sample of participants, it was only considered self-reported PD. Elbaz 2009 was chosen as the main study because it was well designed. |
| Liou et al. 1997        | - Cheng et al. 2018                                                                                                                                            | The PD patients exposed to paraquat were the same in both studies. Cheng et al. 2018 relied on Liou's case-control study to develop a PBPK/PD model.                                                        |
| Hertzman et al. 1994    | - Hertzman et al. 1990                                                                                                                                         | Hertzman et al. 1994 is the most recent study with a larger number of participants.                                                                                                                         |
